# Supplementary material for: Theoretical investigation of protonated thiophene and two of its nitrile substituted derivatives (2-cyanothiophene and 3-cyanothiophene)
Source: Royal Society of Chemistry journal article supplement (doi:10.1039/d0cp03154b), 2020-01-01
Supplement: d0cp03154b4.pdf [file d0cp03154b4.pdf]

Cite this: DOI: 00.0000/xxxxxxxxxx

## Theoretical investigation of protonated thiophene and two of its nitrile substituted derivatives (2-Cyanothiophene and 3-Cyanothiophene)<sup>†</sup>

René Simbizi,<sup>a,b</sup> Godefroid Gahungu,<sup>c,b‡</sup> and Minh Tho Nguyen<sup>d‡</sup>

Received Date

Accepted Date

DOI: 00.0000/xxxxxxxxxx

### Supplementary Information (SI)

<sup>a</sup> Département de Physique, Faculté des Sciences Université du Burundi, B.P. 2700 Bujumbura, Burundi

<sup>b</sup> Centre de Recherche en Sciences Naturelles et de l'Environnement (CRSNE)

<sup>c</sup> Département de Chimie, Faculté des Sciences Université du Burundi, B.P. 2700 Bujumbura, Burundi, E-mail: [godefroid.gahungu@ub.edu.bi](mailto:godefroid.gahungu@ub.edu.bi)

<sup>d</sup> Department of Chemistry, KU Leuven, Celestijnenlaan 200F, B-3001 Leuven, Belgium, E-mail: [minh.nguyen@kuleuven.be](mailto:minh.nguyen@kuleuven.be)

<sup>†</sup> Electronic Supplementary Information (ESI) available: [details of any supplementary information available should be included here].

<sup>‡</sup> Corresponding author.

Table S1: Proton Affinity (PA in  $\text{kJ/mol}$ ) of thiophene at different sites, for different levels of theory and at  $T = 298.15\text{ K}$  and  $T = 10.00\text{ K}$ .

| Level of theory    | Sites of protonation <sup>a</sup> |                    |                   |                      |                    |                   |
|--------------------|-----------------------------------|--------------------|-------------------|----------------------|--------------------|-------------------|
|                    | $T = 298.15\text{ K}$             |                    |                   | $T = 10.00\text{ K}$ |                    |                   |
|                    | S                                 | $\alpha$ -position | $\beta$ -position | S                    | $\alpha$ -position | $\beta$ -position |
| M06-2X/6-31G(d,p)  | 622.83                            | 818.70             | 782.21            | 617.42               | 813.60             | 777.32            |
| M06-2X/aug-cc-pVTZ | 627.86                            | 803.24             | 769.96            | 622.41               | 798.20             | 765.08            |
| G2MP2              | 739.84                            | 816.66             | 785.64            | 734.51               | 811.61             | 780.66            |
| G3MP2              | 739.47                            | 812.98             | 782.59            | 734.11               | 807.90             | 777.61            |
| G4MP2              | 637.59                            | 811.94             | 783.09            | 632.14               | 806.80             | 778.08            |
| G3B3               | 634.09                            | 813.96             | 783.90            | 628.79               | 808.77             | 778.84            |
| CBS-QB3            | 690.93                            | 808.24             | 777.56            | 624.82               | 802.96             | 772.49            |
| NIST               |                                   |                    |                   |                      |                    | 815 <sup>b</sup>  |

<sup>a</sup>The site with higher PA is the position with higher susceptibility of proton attack.<sup>b</sup>NIST value (Hunter and Lias (1998)).Table S2: G2(MP2) and G3B3 Proton Affinity (PA in  $\text{kJ/mol}$ ) at different sites of 2CNT and 3CNT for  $T = 298.15\text{ K}$  and  $T = 150.00\text{ K}$ .

| T (K) | Protonation sites |        |        |        |        |        |        |        |        |        |        |        |
|-------|-------------------|--------|--------|--------|--------|--------|--------|--------|--------|--------|--------|--------|
|       | 1                 |        | 2      |        | 3      |        | 4      |        | 5      |        | 6      |        |
|       | 298.15            | 150.00 | 298.15 | 150.00 | 298.15 | 150.00 | 298.15 | 150.00 | 298.15 | 150.00 | 298.15 | 150.00 |
|       | G2MP2             |        |        |        |        |        |        |        |        |        |        |        |
| 2CNT  | 676.65            | 677.62 | 732.32 | 732.87 | 723.51 | 724.44 | 726.48 | 727.31 | 752.89 | 753.70 | 812.23 | 812.24 |
| 3CNT  | 673.84            | 671.74 | 758.97 | 756.58 | 697.68 | 695.16 | 728.30 | 726.06 | 752.89 | 751.06 | 813.01 | 810.83 |
|       | G3B3              |        |        |        |        |        |        |        |        |        |        |        |
| 2CNT  | 674.93            | 676.09 | 727.75 | 728.30 | 721.24 | 722.40 | 724.53 | 725.36 | 750.15 | 750.84 | 809.03 | 810.23 |
| 3CNT  | 672.67            | 670.70 | 756.24 | 753.75 | 694.00 | 675.23 | 726.20 | 723.91 | 750.30 | 747.88 | 812.84 | 811.27 |

1= Sulfur atom; 2=  $\alpha$ -position; 3=  $\beta$ -position; 4= position equivalent to  $\beta$ -position; 5= position equivalent to  $\alpha$ -position; 6= Protonation at N atom.Table S3: G2(MP2) and G3B3 Proton Affinity (PA in  $\text{kJ/mol}$ ) at different sites of 2CNT and 3CNT for  $T = 10.00\text{ K}$  and  $T = 5.00\text{ K}$ .

| T (K) | Protonation sites |        |        |        |        |        |        |        |        |        |        |        |
|-------|-------------------|--------|--------|--------|--------|--------|--------|--------|--------|--------|--------|--------|
|       | 1                 |        | 2      |        | 3      |        | 4      |        | 5      |        | 6      |        |
|       | 10.00             | 5.00   | 10.00  | 5.00   | 10.00  | 5.00   | 10.00  | 5.00   | 10.00  | 5.00   | 10.00  | 5.00   |
|       | G2MP2             |        |        |        |        |        |        |        |        |        |        |        |
| 2CNT  | 671.89            | 671.79 | 727.27 | 727.17 | 718.79 | 718.69 | 721.66 | 721.56 | 748.07 | 747.97 | 807.49 | 807.39 |
| 3CNT  | 669.08            | 668.97 | 754.03 | 753.94 | 692.65 | 692.54 | 723.49 | 723.38 | 748.48 | 743.55 | 808.06 | 807.95 |
|       | G3B3              |        |        |        |        |        |        |        |        |        |        |        |
| 2CNT  | 670.36            | 670.28 | 722.72 | 722.63 | 716.71 | 716.61 | 719.69 | 719.60 | 745.18 | 745.08 | 804.54 | 804.44 |
| 3CNT  | 668.06            | 667.96 | 751.18 | 751.08 | 689.02 | 688.92 | 721.32 | 721.22 | 745.28 | 745.17 | 809.10 | 793.05 |

1= Sulfur atom; 2=  $\alpha$ -position; 3=  $\beta$ -position; 4= position equivalent to  $\beta$ -position; 5= position equivalent to  $\alpha$ -position; 6= Protonation at N atom.Table S4: Milliken charges for  $2\text{CNT-H}^+$ ,  $3\text{CNT-H}^+$  and  $\text{HCNH}^+$ 

| Atom | $2\text{CNT-H}^+$ | $3\text{CNT-H}^+$ | $\text{HCNH}^+$ |
|------|-------------------|-------------------|-----------------|
| S1   | 0.332             | 0.352             |                 |
| C2   | -0.137            | -0.182            |                 |
| C3   | -0.056            | 0.025             |                 |
| C4   | -0.142            | -0.184            |                 |
| C5   | -0.152            | -0.180            |                 |
| C6   | 0.577             | 0.582             |                 |
| N    | -0.358            | -0.347            | -0.429          |
| C    |                   |                   | 0.071           |

Table S5: G2(MP2) Proton Affinity (PA in  $\text{kJ/mol}$ ) at different sites of some dicyanothiophenes at  $T = 10.00$  and  $298.15\text{ K}$ .

|       | 2      |        | 3      |        | 4      |        | 5      |        | 6      |        | 7      |        | 8       |         |
|-------|--------|--------|--------|--------|--------|--------|--------|--------|--------|--------|--------|--------|---------|---------|
|       | 10.00  | 298.15 | 10.00  | 298.15 | 10.00  | 298.15 | 10.00  | 298.15 | 10.00  | 298.15 | 10.00  | 298.15 | 10.00   | 298.15  |
| 23CNT | 681.51 | 686.45 | 643.23 | 648.04 | 675.01 | 679.68 | 696.81 | 701.49 | 777.06 | 782.39 | 777.91 | 781.87 | 1224.52 | 1229.04 |
| 24CNT | 666.39 | 675.13 | 667.85 | 674.15 | 637.95 | 644.44 | 694.70 | 703.22 | 767.65 | 773.85 | 770.60 | 776.58 | 1261.86 | 1269.79 |

2=  $\alpha$ -position; 3=  $\beta$ -position; 4= position equivalent to  $\beta$ -position; 5= position equivalent to  $\alpha$ -position; 6= Protonation only at N atom of the cyano-group in  $\alpha$ -position; 7= Protonation only at N atom of the cyano-group in  $\beta$ -position; 8= Protationation at both the two Nitrogen atoms of the cyano-groups.

Table S6: Gase phase G2(MP2) and G3B3 calculated enthalpy, entropy and Gibbs free energy ( $\Delta_r H$ ,  $\Delta_r S$  and  $\Delta_r G$  in  $\text{kJ mol}^{-1}$ ) of the reactions yielding hydrogen cyanide, cyano-thiophenes and their protonated forms ( $T = 298.15\text{ K}$  and  $T = 10.00\text{ K}$  for  $P = 1\text{ atm}$ ).

| Reaction                                       |     | $\Delta_r H^{298.15}$ | $\Delta_r G^{298.15}$ | $\Delta_r S^{298.15}$ | $\Delta_r H^{10.00}$ | $\Delta_r G^{10.00}$ | $\Delta_r S^{10.00}$ | Lev. of theory |
|------------------------------------------------|-----|-----------------------|-----------------------|-----------------------|----------------------|----------------------|----------------------|----------------|
| $H_3^+ + CN^- \rightarrow HCN + H_2$           | (1) | -1047.03              | -1038.98              | -0.027                | -1046.24             | -1046.10             | 0.015                | a              |
|                                                |     | -1048.61              | -1045.03              | -0.012                | -1047.93             | -1047.93             | -0.000               | b              |
| $C_4H_4S^+ + CN^- \rightarrow 2CNT + H$        | (2) | -611.21               | -597.15               | -0.047                | -577.91              | -570.55              | -0.736               | a              |
|                                                |     | -607.98               | -595.00               | -0.044                | -609.84              | -609.43              | -0.041               | b              |
| $C_4H_4S^+ + CN^- \rightarrow 3CNT + H$        | (3) | -615.65               | -601.54               | -0.047                | -582.33              | -574.97              | -0.736               | a              |
|                                                |     | -612.64               | -599.65               | -0.044                | -614.51              | -614.09              | -0.041               | b              |
| $CN-H + H_3^+ \rightarrow HCN-H^+ + H_2$       | (4) | 352.21                | -342.91               | -0.031                | -350.67              | -350.69              | 0.002                | a              |
|                                                |     | -353.63               | 348.77                | -0.016                | -352.18              | -352.18              | 0.000                | b              |
| $C_4H_4SCN + H_3^+ \rightarrow 2CNT-H^+ + H_2$ | (5) | -392.19               | -385.01               | -0.024                | -392.22              | -392.22              | 0.000                | a              |
|                                                |     | -387.27               | -385.072              | -0.008                | -391.56              | -391.54              | -0.002               | b              |
| $C_4H_4SCN + H_3^+ \rightarrow 3CNT-H^+ + H_2$ | (6) | -392.98               | -385.42               | -0.025                | -392.79              | -392.79              | 0.000                | a              |
|                                                |     | -391.04               | -390.81               | -0.001                | -392.10              | -392.08              | -0.002               | b              |

a=G2(MP2); b=G3B3.

Table S7: Gase phase G3B3 calculated enthalpy, entropy and Gibbs free energy ( $\Delta_r H$ ,  $\Delta_r S$  and  $\Delta_r G$  in  $\text{kJ mol}^{-1}$ ) of the reactions producing hydrogen cyanide, cyano-thiophenes and their protonated forms ( $T = 1000.00\text{ K}$  and  $T = 5.00\text{ K}$  for  $P = 10^{-5}\text{ atm}$ ).

| Reaction                                       |     | $\Delta_r H^{1000.00}$ | $\Delta_r G^{1000.00}$ | $\Delta_r S^{1000.00}$ | $\Delta_r H^{5.00}$ | $\Delta_r G^{5.00}$ | $\Delta_r S^{5.00}$ |
|------------------------------------------------|-----|------------------------|------------------------|------------------------|---------------------|---------------------|---------------------|
| $H_3^+ + CN^- \rightarrow HCN + H_2$           | (1) | -1044.11               | -1030.32               | -0.046                 | -1018.84            | -1170.50            | 0.509               |
| $C_4H_4S^+ + CN^- \rightarrow 2CNT + H$        | (2) | -562.64                | -433.66                | -0.433                 | -574.21             | -574.00             | -0.001              |
| $C_4H_4S^+ + CN^- \rightarrow 3CNT + H$        | (3) | -567.05                | -438.47                | -0.431                 | -578.93             | -578.72             | -0.001              |
| $CN-H + H_3^+ \rightarrow HCN-H^+ + H_2$       | (4) | 381.56                 | -327.04                | -0.094                 | -352.18             | -290.50             | -0.207              |
| $C_4H_4SCN + H_3^+ \rightarrow 2CNT-H^+ + H_2$ | (5) | -381.56                | -374.56                | -0.023                 | -391.58             | -391.50             | -0.0002             |
| $C_4H_4SCN + H_3^+ \rightarrow 3CNT-H^+ + H_2$ | (6) | -384.86                | -385.77                | 0.003                  | -392.05             | -391.97             | -0.0002             |

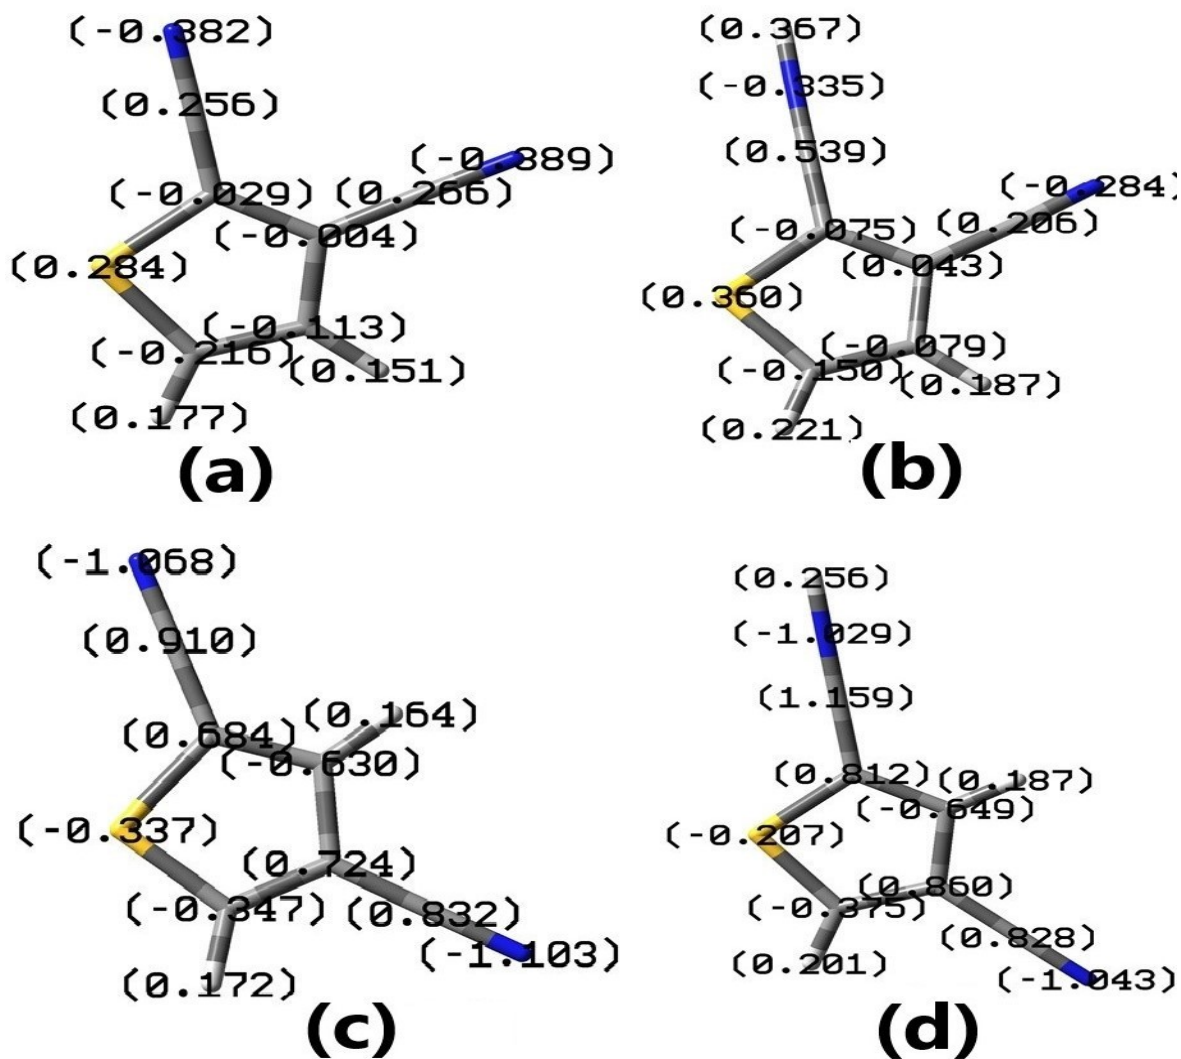

Figure S1: Partial atomic charges for (a) Neutral 2,3-dicyanothiophene and (b) Monoprotonated 2,3-dicyanothiophene (c) Neutral 2,5-dicyanothiophene and (d) Monoprotonated 2,5-dicyanothiophene.

Table S8: Potential energy distribution for 2CNTH<sup>+</sup>

| Frequency<br>( <i>cm</i> <sup>-1</sup> ) | PED<br>(%) | Mode                    | Atoms <sup>1</sup> |    |    |    | PED<br>(%) | Mode                    | Atoms <sup>1</sup> |    |    |   |
|------------------------------------------|------------|-------------------------|--------------------|----|----|----|------------|-------------------------|--------------------|----|----|---|
|                                          |            |                         | h                  | k  | l  | m  |            |                         | h                  | k  | l  | m |
| <b><u>In - plane modes</u></b>           |            |                         |                    |    |    |    |            |                         |                    |    |    |   |
| 3539.33                                  | 97%        | <i>v</i> <sub>NH</sub>  | 7                  | 11 | 0  | 0  |            |                         |                    |    |    |   |
| 3101.63                                  | 66%        | <i>v</i> <sub>CH</sub>  | 4                  | 9  | 0  | 0  | 27%        | <i>v</i> <sub>CH</sub>  | 5                  | 10 | 0  | 0 |
|                                          | 5%         | <i>v</i> <sub>CH</sub>  | 3                  | 8  | 0  | 0  |            |                         |                    |    |    |   |
| 3089.33                                  | 65%        | <i>v</i> <sub>CH</sub>  | 5                  | 10 | 0  | 0  | 19%        | <i>v</i> <sub>CH</sub>  | 3                  | 8  | 0  | 0 |
|                                          | 16%        | <i>v</i> <sub>CH</sub>  | 4                  | 9  | 0  | 0  |            |                         |                    |    |    |   |
| 3081.49                                  | 75%        | <i>v</i> <sub>CH</sub>  | 3                  | 8  | 0  | 0  | 18%        | <i>v</i> <sub>CH</sub>  | 4                  | 9  | 0  | 0 |
|                                          | 7%         | <i>v</i> <sub>CH</sub>  | 5                  | 10 | 0  | 0  |            |                         |                    |    |    |   |
| 2237.41                                  | 83%        | <i>v</i> <sub>C≡N</sub> | 6                  | 7  | 0  | 0  | 14%        | <i>v</i> <sub>CC</sub>  | 2                  | 6  | 0  | 0 |
| 1497.37                                  | 29%        | <i>v</i> <sub>C=C</sub> | 2                  | 3  | 0  | 0  | 23%        | <i>v</i> <sub>C=C</sub> | 4                  | 5  | 0  | 0 |
|                                          | 11%        | <i>δ</i> <sub>CCH</sub> | 4                  | 3  | 8  | 0  | 7%         | <i>δ</i> <sub>CCH</sub> |                    | 3  | 8  | 0 |
|                                          | 7%         | <i>v</i> <sub>CC</sub>  | 2                  | 6  | 0  | 0  | 8%         | <i>δ</i> <sub>CCH</sub> | 3                  | 4  | 9  | 0 |
| 1408.49                                  | 40%        | <i>v</i> <sub>CC</sub>  | 3                  | 4  | 0  | 0  | 15%        | <i>δ</i> <sub>CCH</sub> | 5                  | 4  | 9  | 0 |
|                                          | 11%        | <i>δ</i> <sub>CCH</sub> | 3                  | 4  | 9  | 0  | 11%        | <i>v</i> <sub>C=C</sub> | 4                  | 5  | 0  | 0 |
|                                          | 6%         | <i>δ</i> <sub>CCH</sub> | 2                  | 3  | 8  | 0  |            |                         |                    |    |    |   |
| 1335.64                                  | 24%        | <i>v</i> <sub>C=C</sub> | 4                  | 5  | 0  | 0  | 23%        | <i>v</i> <sub>C=C</sub> | 2                  | 3  | 0  | 0 |
|                                          | 14%        | <i>δ</i> <sub>SCH</sub> | 1                  | 5  | 10 | 0  | 14%        | <i>v</i> <sub>CC</sub>  | 2                  | 6  | 0  | 0 |
|                                          | 14%        | <i>δ</i> <sub>CCH</sub> | 4                  | 5  | 10 | 0  |            |                         |                    |    |    |   |
| 1236.89                                  | 20%        | <i>δ</i> <sub>CCH</sub> | 2                  | 3  | 8  | 0  | 18%        | <i>δ</i> <sub>CCH</sub> | 4                  | 3  | 8  | 0 |
|                                          | 10%        | <i>v</i> <sub>CC</sub>  | 2                  | 6  | 0  | 0  | 10%        | <i>δ</i> <sub>CCH</sub> | 5                  | 4  | 9  | 0 |
|                                          | 9%         | <i>δ</i> <sub>CCH</sub> | 3                  | 4  | 9  | 0  | 8%         | <i>δ</i> <sub>CCH</sub> | 4                  | 5  | 10 | 0 |
| 1173.73                                  | 29%        | <i>v</i> <sub>CC</sub>  | 2                  | 6  | 0  | 0  | 22%        | <i>v</i> <sub>SC</sub>  | 1                  | 2  | 0  | 0 |
|                                          | 12%        | <i>v</i> <sub>C=C</sub> | 2                  | 3  | 0  | 0  | 7%         | <i>v</i> <sub>CC</sub>  | 3                  | 4  | 0  | 0 |
|                                          | 6%         | <i>δ</i> <sub>CCH</sub> | 2                  | 3  | 8  | 0  |            |                         |                    |    |    |   |
| 1086.10                                  | 27%        | <i>δ</i> <sub>CCH</sub> | 4                  | 5  | 10 | 0  | 25%        | <i>δ</i> <sub>SCH</sub> | 1                  | 5  | 10 | 0 |
|                                          | 19%        | <i>v</i> <sub>C=C</sub> | 4                  | 5  | 0  | 0  | 14%        | <i>δ</i> <sub>CCH</sub> | 5                  | 4  | 9  | 0 |
|                                          | 11%        | <i>δ</i> <sub>CCH</sub> | 3                  | 4  | 9  | 0  |            |                         |                    |    |    |   |
| 1057.05                                  | 26%        | <i>v</i> <sub>CC</sub>  | 3                  | 4  | 0  | 0  | 21%        | <i>δ</i> <sub>CCH</sub> | 4                  | 3  | 8  | 0 |
|                                          | 10%        | <i>δ</i> <sub>CCH</sub> | 2                  | 3  | 8  | 0  | 10%        | <i>δ</i> <sub>CCH</sub> | 3                  | 4  | 9  | 0 |
|                                          | 9%         | <i>δ</i> <sub>CCH</sub> | 5                  | 4  | 9  | 0  | 6%         | <i>v</i> <sub>CC</sub>  | 2                  | 6  | 0  | 0 |
| 855.06                                   | 49%        | <i>v</i> <sub>SC</sub>  | 1                  | 5  | 0  | 0  | 16%        | <i>δ</i> <sub>SCC</sub> | 1                  | 5  | 4  | 0 |
|                                          | 12%        | <i>δ</i> <sub>CCC</sub> | 3                  | 4  | 5  | 0  | 7%         | <i>δ</i> <sub>SCH</sub> | 1                  | 5  | 10 | 0 |
|                                          | 6%         | <i>δ</i> <sub>SCH</sub> | 3                  | 4  | 9  | 0  |            |                         |                    |    |    |   |
| 738.13                                   | 35%        | <i>v</i> <sub>SC</sub>  | 1                  | 5  | 0  | 0  | 22%        | <i>v</i> <sub>SC</sub>  | 1                  | 2  | 0  | 0 |
|                                          | 13%        | <i>δ</i> <sub>CCC</sub> | 3                  | 4  | 5  | 0  | 13%        | <i>δ</i> <sub>CCC</sub> | 2                  | 3  | 4  | 0 |
|                                          | 5%         | <i>δ</i> <sub>CCH</sub> | 2                  | 3  | 8  | 0  | 5%         | <i>δ</i> <sub>CCH</sub> | 5                  | 4  | 9  | 0 |
| 681.15                                   | 26%        | <i>v</i> <sub>SC</sub>  | 1                  | 2  | 0  | 0  | 12%        | <i>δ</i> <sub>CCN</sub> | 2                  | 6  | 7  | 0 |
|                                          | 10%        | <i>δ</i> <sub>CSC</sub> | 2                  | 1  | 5  | 0  | 9%         | <i>v</i> <sub>CC</sub>  | 2                  | 6  | 0  | 0 |
|                                          | 8%         | <i>v</i> <sub>SC</sub>  | 1                  | 5  | 0  | 0  | 8%         | <i>δ</i> <sub>SCC</sub> | 1                  | 5  | 4  | 0 |
| 634.21                                   | 93%        | <i>δ</i> <sub>CNH</sub> | 6                  | 7  | 11 | 0  | 6%         | <i>δ</i> <sub>CCN</sub> | 2                  | 6  | 7  | 0 |
| 520.93                                   | 51%        | <i>δ</i> <sub>CCN</sub> | 2                  | 6  | 7  | 0  | 18%        | <i>v</i> <sub>SC</sub>  | 1                  | 2  | 2  | 0 |
|                                          | 9%         | <i>δ</i> <sub>CCC</sub> | 3                  | 2  | 6  | 0  | 7%         | <i>δ</i> <sub>CSC</sub> | 2                  | 1  | 5  | 0 |
|                                          | 6%         | <i>δ</i> <sub>SCC</sub> | 1                  | 2  | 6  | 0  |            |                         |                    |    |    |   |
| 477.06                                   | 30%        | <i>v</i> <sub>CC</sub>  | 2                  | 6  | 0  | 0  | 20%        | <i>δ</i> <sub>SCC</sub> | 1                  | 2  | 3  | 0 |
|                                          | 13%        | <i>δ</i> <sub>CSC</sub> | 2                  | 1  | 5  | 0  | 10%        | <i>v</i> <sub>SC</sub>  | 1                  | 2  | 0  | 0 |
|                                          | 6%         | <i>δ</i> <sub>CCC</sub> | 2                  | 3  | 4  | 00 |            |                         |                    |    |    |   |
| 143.33                                   | 44%        | <i>δ</i> <sub>CCN</sub> | 2                  | 6  | 7  | 0  | 28%        | <i>δ</i> <sub>SCC</sub> | 1                  | 2  | 6  | 0 |
|                                          | 26%        | <i>δ</i> <sub>CCC</sub> | 3                  | 2  | 6  | 0  |            |                         |                    |    |    |   |

(Continued)

Table S8 – (Continued)

| Frequency<br>( $cm^{-1}$ )    | PED<br>(%) | Mode           | Atoms <sup>1</sup> |   |   |    | PED<br>(%) | Mode           | Atoms <sup>1</sup> |   |   |    |
|-------------------------------|------------|----------------|--------------------|---|---|----|------------|----------------|--------------------|---|---|----|
|                               |            |                | h                  | k | l | m  |            |                | h                  | k | l | m  |
| <b>Out - of - plane modes</b> |            |                |                    |   |   |    |            |                |                    |   |   |    |
| 943.69                        | 31%        | $\gamma_{HCC}$ | 8                  | 3 | 4 | 9  | 27%        | $\gamma_{HCC}$ | 9                  | 4 | 5 | 10 |
|                               | 10%        | $\gamma_{HCC}$ | 9                  | 4 | 5 | 1  | 8%         | $\gamma_{CCH}$ | 2                  | 3 | 4 | 9  |
|                               | 6%         | $\gamma_{CCH}$ | 6                  | 2 | 3 | 8  | 6%         | $\gamma_{SCH}$ | 1                  | 2 | 3 | 8  |
| 866.48                        | 25%        | $\gamma_{HCC}$ | 9                  | 4 | 5 | 10 | 15%        | $\gamma_{CCH}$ | 3                  | 4 | 5 | 10 |
|                               | 14%        | $\gamma_{HCC}$ | 6                  | 2 | 3 | 8  | 13%        | $\gamma_{HCC}$ | 8                  | 3 | 4 | 5  |
|                               | 12%        | $\gamma_{SCH}$ | 1                  | 2 | 3 | 8  | 9%         | $\gamma_{SCH}$ | 2                  | 1 | 5 | 10 |
| 751.15                        | 22%        | $\gamma_{CCH}$ | 3                  | 4 | 5 | 10 | 22%        | $\gamma_{HCC}$ | 9                  | 4 | 5 | 1  |
|                               | 20%        | $\gamma_{CCH}$ | 2                  | 3 | 4 | 9  | 16%        | $\gamma_{SCH}$ | 2                  | 1 | 5 | 10 |
|                               | 7%         | $\gamma_{CCH}$ | 6                  | 2 | 3 | 8  | 6%         | $\gamma_{SCH}$ | 1                  | 2 | 3 | 8  |
| 551.49                        | 60%        | $\gamma_{CN}$  | 0                  | 2 | 6 | 7  | 8%         | $\gamma_{CCC}$ | 1                  | 2 | 3 | 4  |
|                               | 7%         | $\gamma_{CCC}$ | 2                  | 3 | 4 | 5  |            |                |                    |   |   |    |
| 525.46                        | 61%        | $\gamma_{CN}$  | 0                  | 2 | 6 | 7  | 9%         | $\gamma_{CCS}$ | 3                  | 4 | 5 | 1  |
|                               | 6%         | $\gamma_{CCC}$ | 2                  | 3 | 4 | 5  |            |                |                    |   |   |    |
| 420.34                        | 36%        | $\gamma_{CN}$  | 0                  | 2 | 6 | 7  | 16%        | $\gamma_{SCC}$ | 5                  | 1 | 2 | 3  |
|                               | 14%        | $\gamma_{SCC}$ | 2                  | 1 | 5 | 4  | 11%        | $\gamma_{CCC}$ | 1                  | 2 | 3 | 4  |
|                               | 9%         | $\gamma_{CCS}$ | 3                  | 4 | 5 | 1  |            |                |                    |   |   |    |
| 287.26                        | 69%        | $\gamma_{NH}$  | 0                  | 6 | 7 | 11 | 17%        | $\gamma_{CN}$  | 0                  | 2 | 6 | 7  |
| 134.42                        | 32%        | $\gamma_{CN}$  | 0                  | 2 | 6 | 7  | 24%        | $\gamma_{SCC}$ | 6                  | 2 | 3 | 4  |
|                               | 19%        | $\gamma_{SCC}$ | 5                  | 1 | 2 | 6  | 17%        | $\gamma_{CCH}$ | 6                  | 2 | 3 | 8  |
|                               | 5%         | $\gamma_{NH}$  | 0                  | 6 | 7 | 11 |            |                |                    |   |   |    |

<sup>1</sup> See Figure 1 for atom numbering.

v: stretching,  $\delta$ : in-plane bending and  $\gamma$ : out-of-plane bending modes.

Table S9: Potential energy distribution for  $3CNTH^+$ 

| Frequency<br>( $cm^{-1}$ ) | PED<br>(%) | Mode              | Atoms <sup>1</sup> |    |    |   | PED<br>(%) | Mode           | Atoms <sup>1</sup> |   |    |   |
|----------------------------|------------|-------------------|--------------------|----|----|---|------------|----------------|--------------------|---|----|---|
|                            |            |                   | h                  | k  | l  | m |            |                | h                  | k | l  | m |
| <b>In - plane modes</b>    |            |                   |                    |    |    |   |            |                |                    |   |    |   |
| 3545.56                    | 97%        | $\nu_{NH}$        | 7                  | 11 | 0  | 0 |            |                |                    |   |    |   |
| 3122.71                    | 82%        | $\nu_{CH}$        | 5                  | 10 | 0  | 0 | 16%        | $\nu_{CH}$     | 4                  | 9 | 0  | 0 |
| 3111.54                    | 99%        | $\nu_{CH}$        | 2                  | 8  | 0  | 0 |            |                |                    |   |    |   |
| 3103.59                    | 83%        | $\nu_{CH}$        | 4                  | 9  | 0  | 0 | 17%        | $\nu_{CH}$     | 5                  | 9 | 0  | 0 |
| 2243.78                    | 85%        | $\nu_{C\equiv N}$ | 6                  | 7  | 0  | 0 | 12%        | $\nu_{CC}$     | 3                  | 6 | 0  | 0 |
| 1495.04                    | 49%        | $\nu_{C=C}$       | 4                  | 5  | 0  | 0 | 11%        | $\delta_{CCH}$ | 3                  | 4 | 9  | 0 |
|                            | 10%        | $\nu_{C=C}$       | 2                  | 3  | 0  | 0 | 6%         | $\delta_{CCH}$ | 5                  | 4 | 9  | 0 |
| 1402.09                    | 25%        | $\nu_{C=C}$       | 2                  | 3  | 0  | 0 | 16%        | $\nu_{C=C}$    | 4                  | 5 | 0  | 0 |
|                            | 15%        | $\delta_{CCH}$    | 3                  | 2  | 8  | 0 | 14%        | $\delta_{SCH}$ | 1                  | 2 | 8  | 0 |
|                            | 10%        | $\nu_{CC}$        | 3                  | 6  | 0  | 0 | 5%         | $\delta_{SCH}$ | 1                  | 5 | 10 | 0 |
| 1351.97                    | 36%        | $\nu_{CC}$        | 3                  | 4  | 0  | 0 | 25%        | $\nu_{C=C}$    | 2                  | 3 | 0  | 0 |
|                            | 9%         | $\delta_{CCH}$    | 5                  | 4  | 9  | 0 | 8%         | $\delta_{CCH}$ | 4                  | 5 | 10 | 0 |
| 1227.94                    | 24%        | $\delta_{CCH}$    | 3                  | 2  | 8  | 0 | 13%        | $\delta_{SCH}$ | 1                  | 2 | 8  | 0 |
|                            | 12%        | $\delta_{CCH}$    | 4                  | 5  | 10 | 0 | 11%        | $\delta_{SCH}$ | 5                  | 4 | 9  | 0 |
|                            | 10%        | $\delta_{SCH}$    | 1                  | 5  | 10 | 0 | 9%         | $\delta_{SCH}$ | 3                  | 4 | 9  | 0 |
| 1167.85                    | 34%        | $\delta_{CCH}$    | 1                  | 2  | 8  | 0 | 27%        | $\delta_{SCH}$ | 3                  | 2 | 8  | 0 |
|                            | 20%        | $\nu_{CC}$        | 3                  | 6  | 0  | 0 |            |                |                    |   |    |   |

(Continued)

Table S9 – (Continued)

| Frequency<br>( $cm^{-1}$ )    | PED<br>(%) | Mode            | Atoms <sup>1</sup> |   |    |    | PED<br>(%) | Mode             | Atoms <sup>1</sup> |   |    |    |
|-------------------------------|------------|-----------------|--------------------|---|----|----|------------|------------------|--------------------|---|----|----|
|                               |            |                 | h                  | k | l  | m  |            |                  | h                  | k | l  | m  |
| 1091.36                       | 20%        | $\delta_{CCH}$  | 5                  | 4 | 9  | 0  | 19%        | $\delta_{CCH}$   | 4                  | 5 | 10 | 0  |
|                               | 18%        | $\delta_{CCH}$  | 3                  | 4 | 9  | 0  | 17%        | $\delta_{SCH}$   | 1                  | 5 | 10 | 0  |
|                               | 10%        | $\nu_{C=C}$     | 4                  | 5 | 0  | 0  |            |                  |                    |   |    |    |
| 920.50                        | 15%        | $\delta_{CCC}$  | 3                  | 4 | 5  | 0  | 15%        | $\nu_{CC}$       | 3                  | 6 | 0  | 0  |
|                               | 14%        | $\nu_{CC}$      | 3                  | 4 | 0  | 0  | 13%        | $\nu_{C=C}$      | 2                  | 3 | 0  | 0  |
|                               | 11%        | $\delta_{SCH}$  | 1                  | 5 | 10 | 0  | 8%         | $\delta_{SCC}$   | 1                  | 5 | 4  | 0  |
| 880.44                        | 72%        | $\nu_{SC}$      | 1                  | 2 | 0  | 0  | 15%        | $\delta_{CCH}$   | 1                  | 2 | 8  | 0  |
|                               | 6%         | $\delta_{CCC}$  | 2                  | 3 | 4  | 0  |            |                  |                    |   |    |    |
| 800.41                        | 63%        | $\nu_{SC}$      | 4                  | 5 |    | 0  | 11%        | $\delta_{SCC}$   | 1                  | 5 | 4  | 0  |
|                               | 6%         | $\nu_{CC}$      | 3                  | 4 | 0  | 0  |            |                  |                    |   |    |    |
| 637.28                        | 64%        | $\delta_{CNH}$  | 6                  | 7 | 11 | 0  | 8%         | $\delta_{CSC}$   | 2                  | 1 | 5  | 0  |
|                               | 8%         | $\nu_{SC}$      | 1                  | 5 | 0  | 0  | 7%         | $\delta_{CCN}$   | 3                  | 6 | 7  | 0  |
| 627.50                        | 53%        | $\delta_{CNH}$  | 6                  | 7 | 11 | 0  | 13%        | $\delta_{CSC}$   | 2                  | 1 | 5  | 0  |
|                               | 13%        | $\nu_{SC}$      | 1                  | 5 | 0  | 0  |            |                  |                    |   |    |    |
| 558.52                        | 61%        | $\delta_{CCN}$  | 3                  | 6 | 7  | 0  | 13%        | $\delta_{CCC}$   | 4                  | 3 | 6  | 0  |
|                               | 11%        | $\delta_{CCC}$  | 2                  | 3 | 6  | 0  |            |                  |                    |   |    |    |
| 472.43                        | 37%        | $\nu_{CC}$      | 3                  | 6 | 0  | 0  | 14%        | $\delta_{CCC}$   | 2                  | 3 | 4  | 0  |
|                               | 13%        | $\nu_{SC}$      | 1                  | 2 | 0  | 0  | 9%         | $\delta_{SCC}$   | 2                  | 1 | 5  | 0  |
| 147.54                        | 47%        | $\delta_{CCN}$  | 3                  | 6 | 7  | 0  | 25%        | $\delta_{CCC}$   | 2                  | 3 | 6  | 0  |
|                               | 25%        | $\delta_{CCC}$  | 4                  | 3 | 6  | 0  |            |                  |                    |   |    |    |
| <b>Out - of - plane modes</b> |            |                 |                    |   |    |    |            |                  |                    |   |    |    |
| 894.08                        | 49%        | $\gamma_{HCCH}$ | 9                  | 4 | 5  | 10 | 11%        | $\gamma_{HCCS}$  | 9                  | 4 | 5  | 1  |
|                               | 10%        | $\gamma_{CCCH}$ | 2                  | 3 | 4  | 9  | 9%         | $\gamma_{CCCH}$  | 3                  | 4 | 5  | 10 |
|                               | 9%         | $\gamma_{CCCH}$ | 6                  | 3 | 4  | 9  | 7%         | $\gamma_{CSCH}$  | 2                  | 1 | 5  | 10 |
| 799.58                        | 33%        | $\gamma_{HCCC}$ | 8                  | 2 | 3  | 6  | 26%        | $\gamma_{HCCC}$  | 8                  | 2 | 3  | 4  |
|                               | 21%        | $\gamma_{CSCH}$ | 5                  | 1 | 2  | 8  |            |                  |                    |   |    |    |
| 713.74                        | 27%        | $\gamma_{CCCH}$ | 3                  | 4 | 5  | 10 | 17%        | $\gamma_{CSCH}$  | 2                  | 1 | 5  | 10 |
|                               | 14%        | $\gamma_{HCCS}$ | 9                  | 4 | 5  | 1  | 11%        | $\gamma_{HCCC}$  | 2                  | 3 | 4  | 9  |
|                               | 10%        | $\gamma_{CCCH}$ | 8                  | 2 | 3  | 4  | 9%         | $\gamma_{CCCH}$  | 6                  | 3 | 4  | 9  |
| 604.43                        | 53%        | $\gamma_{CCN}$  | 3                  | 6 | 7  | 0  | 10%        | $\gamma_{CCCC}$  | 2                  | 3 | 4  | 5  |
|                               | 8%         | $\gamma_{SCCC}$ | 1                  | 2 | 3  | 4  | 5%         | $\gamma_{CCCH}$  | 8                  | 2 | 3  | 4  |
| 497.78                        | 74%        | $\gamma_{CCN}$  | 0                  | 3 | 6  | 7  | 6%         | $\gamma_{CCCS}$  | 3                  | 4 | 5  | 1  |
|                               | 5%         | $\gamma_{CCCC}$ | 2                  | 3 | 4  | 5  |            |                  |                    |   |    |    |
| 441.05                        | 21%        | $\gamma_{CCN}$  | 0                  | 3 | 6  | 7  | 20%        | $\gamma_{CSCC}$  | 2                  | 1 | 5  | 4  |
|                               | 19%        | $\gamma_{SCCC}$ | 5                  | 1 | 2  | 3  | 14%        | $\gamma_{SCCC}$  | 1                  | 2 | 3  | 4  |
|                               | 5%         | $\gamma_{CCCS}$ | 3                  | 4 | 5  | 1  |            |                  |                    |   |    |    |
| 366.92                        | 82%        | $\gamma_{CNH}$  | 0                  | 6 | 7  | 11 | 14%        | $\gamma_{CCN}$   | 0                  | 3 | 6  | 7  |
| 132.27                        | 34%        | $\gamma_{CCN}$  | 0                  | 3 | 6  | 7  | 21%        | $\gamma_{SCCCC}$ | 1                  | 2 | 3  | 6  |
|                               | 18%        | $\gamma_{CCCC}$ | 6                  | 3 | 4  | 5  | 12%        | $\gamma_{CCCH}$  | 6                  | 3 | 4  | 9  |
|                               | 12%        | $\gamma_{HCCC}$ | 8                  | 2 | 3  | 6  |            |                  |                    |   |    |    |

<sup>1</sup> See Figure 1 for atom numbering.

$\nu$ : stretching,  $\delta$ : in-plane bending and  $\gamma$ : out-of-plane bending modes.

Table S10: M06-2X/6-31G(d,p) calculated frequencies ( $cm^{-1}$ ), infrared intensities ( $km.mol^{-1}$ ) and Raman activities ( $\text{\AA}^4/amu$ ) and Raman intensities ( $\times 10^{-24} F^2.m^{-1}.kg^{-1}$ ) for  $2CNTH^+$  and  $3CNTH^+$ .

| $2CNTH^+$ |           |          |         |            |           | $3CNTH^+$ |           |          |         |            |           |
|-----------|-----------|----------|---------|------------|-----------|-----------|-----------|----------|---------|------------|-----------|
| Sym       | NSc.Freq. | Sc.Freq. | IR int. | Ram. Activ | Ram. Int. | Sym       | NSc.Freq. | Sc.Freq. | IR int. | Ram. Activ | Rama. Int |
| A'        | 3753      | 3539     | 1380.68 | 16.58      | 1.10      | A'        | 3747      | 3546     | 1337.37 | 12.96      | 1.79      |
| A'        | 3289      | 3102     | 23.22   | 209.08     | 21.15     | A'        | 3301      | 3123     | 20.99   | 150.13     | 73.06     |
| A'        | 3276      | 3089     | 29.15   | 73.37      | 7.51      | A'        | 3289      | 3112     | 34.28   | 55.95      | 8.29      |
| A'        | 3268      | 3081     | 1.65    | 74.84      | 7.72      | A'        | 3280      | 3104     | 13.57   | 63.80      | 1.27      |
| A'        | 2388      | 2237     | 667.39  | 322.88     | 75.72     | A'        | 2395      | 2244     | 573.87  | 343.51     | 35.43     |
| A'        | 1560      | 1497     | 23.65   | 1.35       | 0.70      | A'        | 1573      | 1495     | 59.30   | 36.55      | 10.82     |
| A'        | 1467      | 1408     | 144.82  | 66.51      | 38.44     | A'        | 1479      | 1402     | 95.13   | 24.85      | 4.86      |
| A'        | 1395      | 1336     | 162.92  | 58.68      | 37.11     | A'        | 1419      | 1352     | 14.53   | 4.04       | 0.13      |
| A'        | 1278      | 1237     | 38.13   | 4.45       | 3.19      | A'        | 1262      | 1228     | 21.69   | 7.30       | 10.42     |
| A'        | 1231      | 1174     | 12.48   | 3.43       | 2.67      | A'        | 1214      | 1168     | 61.18   | 9.65       | 4.18      |
| A'        | 1121      | 1086     | 7.14    | 12.90      | 11.37     | A'        | 1121      | 1091     | 12.52   | 1.75       | 5.26      |
| A'        | 1094      | 1057     | 28.14   | 1.08       | 1.00      | A'        | 958       | 920      | 7.03    | 5.79       | 0.20      |
| A''       | 977       | 944      | 0.13    | 0.77       | 0.84      | A''       | 934       | 894      | 0.36    | 0.15       | 31.68     |
| A''       | 907       | 866      | 0.38    | 0.94       | 1.17      | A'        | 928       | 880      | 30.25   | 5.00       | 6.05      |
| A'        | 889       | 855      | 24.93   | 6.58       | 8.31      | A'        | 846       | 800      | 0.58    | 22.77      | 0.18      |
| A''       | 783       | 751      | 79.80   | 1.80       | 2.74      | A''       | 833       | 800      | 65.76   | 0.14       | 6.56      |
| A'        | 767       | 738      | 5.38    | 9.86       | 15.44     | A''       | 745       | 714      | 23.43   | 3.20       | 1.53      |
| A'        | 711       | 681      | 1.65    | 21.09      | 37.05     | A'        | 662       | 637      | 69.17   | 2.16       | 7.60      |
| A'        | 658       | 634      | 132.93  | 0.36       | 0.69      | A'        | 652       | 627      | 65.12   | 5.27       | 5.30      |
| A''       | 571       | 551      | 6.66    | 0.33       | 0.78      | A''       | 625       | 604      | 14.52   | 0.06       | 2.50      |
| A''       | 544       | 525      | 0.53    | 0.46       | 1.17      | A'        | 581       | 559      | 4.42    | 2.08       | 14.47     |
| A'        | 543       | 521      | 1.62    | 2.08       | 5.39      | A''       | 515       | 498      | 0.50    | 3.91       | 19.05     |
| A'        | 495       | 477      | 7.22    | 10.67      | 31.42     | A'        | 494       | 472      | 12.55   | 11.86      | 80.05     |
| A''       | 431       | 420      | 4.56    | 2.98       | 10.58     | A''       | 453       | 441      | 0.35    | 0.39       | 6.44      |
| A''       | 298       | 287      | 179.53  | 2.26       | 14.42     | A''       | 381       | 367      | 173.99  | 1.90       | 5.60      |
| A'        | 149       | 143      | 4.85    | 4.75       | 97.22     | A'        | 153       | 148      | 3.06    | 3.76       | 14.88     |
| A''       | 137       | 134      | 5.37    | 0.19       | 4.40      | A''       | 136       | 132      | 4.71    | 0.08       | 0.86      |

Table S11: Potential energy distribution for stretching and bending modes of  $HCNH^+$  and IR intensities.

| Frequency<br>( $cm^{-1}$ ) | IR Int.<br>( $km/mol$ ) | PED<br>(%) | Mode              | Atoms <sup>1</sup> |   |   |   | PED<br>(%) | Mode           | Atoms <sup>1</sup> |   |   |   |
|----------------------------|-------------------------|------------|-------------------|--------------------|---|---|---|------------|----------------|--------------------|---|---|---|
|                            |                         |            |                   | h                  | k | l | m |            |                | h                  | k | l | m |
| 3482.94                    | 611.57                  | 98%        | $\nu_{NH}$        | 2                  | 4 | 0 | 0 |            |                |                    |   |   |   |
| 3187.90                    | 249.68                  | 96%        | $\nu_{CH}$        | 1                  | 3 | 0 | 0 |            |                |                    |   |   |   |
| 2155.69                    | 35.05                   | 98%        | $\nu_{C\equiv N}$ | 1                  | 2 | 0 | 0 |            |                |                    |   |   |   |
| 791.15                     | 183.41                  | 51%        | $\gamma_{NCH}$    | 0                  | 2 | 1 | 3 | 49%        | $\gamma_{CNH}$ | 0                  | 1 | 2 | 4 |
| 791.15                     | 183.41                  | 51%        | $\delta_{NCH}$    | 2                  | 1 | 3 | 0 | 49%        | $\delta_{CNH}$ | 1                  | 2 | 4 | 0 |
| 756.00                     | 21.77                   | 51%        | $\delta_{CNH}$    | 1                  | 2 | 4 | 0 | 49%        | $\delta_{NCH}$ | 2                  | 1 | 3 | 0 |
| 756.00                     | 21.77                   | 51%        | $\gamma_{CNH}$    | 0                  | 1 | 2 | 4 | 49%        | $\gamma_{NCH}$ | 0                  | 2 | 1 | 3 |

<sup>1</sup> See Figure 1 for atom numbering.

v: stretching,  $\delta$ : in-plane bending and  $\gamma$ : out-of-plane bending modes.



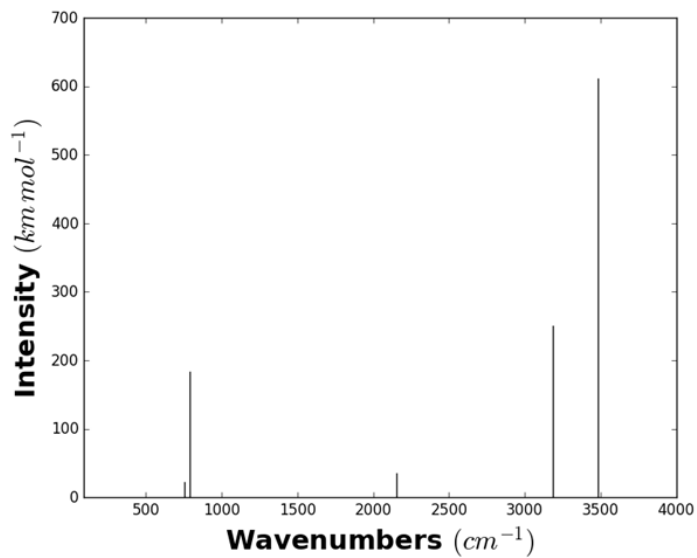

(a)

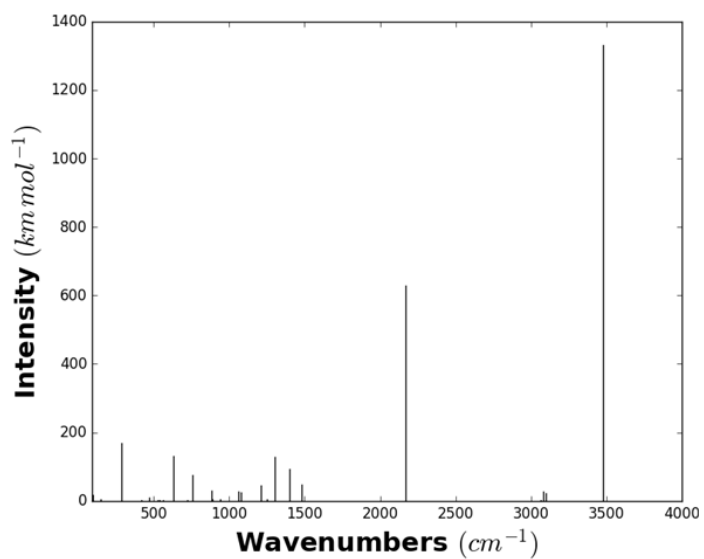

(b)

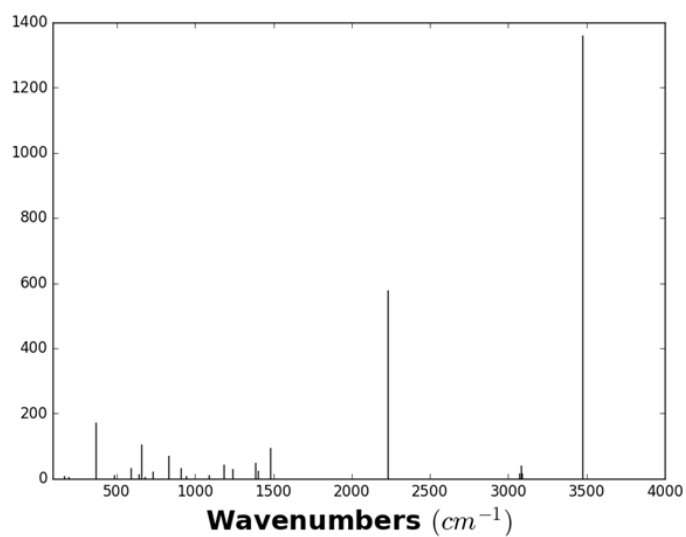

(c)

Figure S2: M06-2X/6-31G(d,p) gas phase simulated IR spectra of (a)  $\text{HCNH}^+$ , (b)  $2\text{CNTH}^+$  and (c)  $3\text{CNTH}^+$ .

Table S12: M06-2X/6-31G(d,p) calculated frequencies and intensities for hyperfine structures of  $HCNH^+$  and for strongest rotational lines at 10.00 K of  $3CNTH^+$ .

| $CNH^+$ |   |       |             |              | $2CNTH^+$       |                  |   |                    |              |                 |
|---------|---|-------|-------------|--------------|-----------------|------------------|---|--------------------|--------------|-----------------|
| $J'$    | ← | $J''$ | $\nu_{exp}$ | $\nu_{calc}$ | $Int (nm^2MHz)$ | $J'_{K-1K+1} F'$ | ← | $J''_{K-1K+1} F''$ | $\nu_{calc}$ | $Int (nm^2MHz)$ |
| 3,4     | ← | 2,3   | 222329.2990 | 222329.2990  | 3.565E-02       | 8,19             | ← | 7,08               | 80552.491    | 3.051E-02       |
| 2,3     | ← | 1,2   |             | 148221.4671  | 2.726E-02       | 8,09             | ← | 7,18               | 80552.491    | 3.051E-02       |
| 3,3     | ← | 2,2   |             | 222329.2939  | 2.465E-02       | 9,110            | ← | 8,09               | 91083.833    | 2.903E-02       |
| 4,5     | ← | 3,4   | 296433.6520 | 296433.6613  | 2.398E-02       | 9,010            | ← | 8,19               | 91083.833    | 2.903E-02       |
| 4,4     | ← | 3,3   |             | 296433.6580  | 1.840E-02       | 7,18             | ← | 6,07               | 70020.211    | 2.901E-02       |
| 3,2     | ← | 2,1   |             | 222329.2725  | 1.664E-02       | 7,08             | ← | 6,17               | 70020.211    | 2.901E-02       |
| 2,2     | ← | 1,1   |             | 148221.4580  | 1.460E-02       | 9,210            | ← | 8,19               | 83644.940    | 2.865E-02       |
| 4,3     | ← | 3,2   |             | 296433.6489  | 1.402E-02       | 9,810            | ← | 8,29               | 83644.940    | 2.865E-02       |
| 5,6     | ← | 4,5   |             | 370533.3955  | 9.567E-03       | 8,29             | ← | 7,18               | 73112.444    | 2.790E-02       |
| 5,5     | ← | 4,4   |             | 370533.3932  | 7.771E-03       | 8,19             | ← | 7,28               | 73112.446    | 2.790E-02       |
| 1,2     | ← | 0,1   | 74111.3300  | 74111.3290   | 6.809E-03       | 8,18             | ← | 7,07               | 80552.471    | 2.687E-02       |
| 2,1     | ← | 1,0   | 148221.4500 | 148221.3512  | 6.491E-03       | 8,08             | ← | 7,17               | 80552.471    | 2.687E-02       |
| 5,4     | ← | 4,3   | 370533.3750 | 370533.3882  | 6.296E-03       | 10,911           | ← | 9,810              | 94176.399    | 2.667E-02       |
| 2,2     | ← | 1,2   |             | 148221.3298  | 4.868E-03       | 10,9211          | ← | 9,810              | 94176.399    | 2.667E-02       |
| 2,2     | ← | 1,2   |             | 148221.3298  | 4.868E-03       | 10,8311          | ← | 9,7210             | 86735.919    | 2.660E-02       |
| 1,1     | ← | 0,1   | 74111.1400  | 74111.2008   | 4.085E-03       | 10,8211          | ← | 9,7310             | 86735.920    | 2.660E-02       |
| 3,3     | ← | 2,3   |             | 222329.1565  | 3.081E-03       | 9,310            | ← | 8,629              | 76202.620    | 2.654E-02       |
| 3,3     | ← | 2,3   |             | 222329.1565  | 3.081E-03       | 9,7210           | ← | 8,639              | 76202.635    | 2.654E-02       |
| 6,7     | ← | 5,6   | 444627.3610 | 444627.3439  | 2.411E-03       | 9,919            | ← | 8,808              | 91083.817    | 2.594E-02       |
| 6,6     | ← | 5,5   |             | 444627.3422  | 2.031E-03       | 9,909            | ← | 8,818              | 91083.817    | 2.594E-02       |
| 6,5     | ← | 5,4   |             | 444627.3390  | 1.709E-03       | 9,829            | ← | 8,718              | 83644.903    | 2.560E-02       |
| 1,0     | ← | 0,1   | 74111.5400  | 74111.5213   | 1.362E-03       | 9,819            | ← | 8,728              | 83644.903    | 2.560E-02       |
| 4,4     | ← | 3,4   |             | 296433.5156  | 1.226E-03       | 10,1011          | ← | 9,910              | 101614.120   | 2.526E-02       |
| 4,4     | ← | 3,4   |             | 296433.5156  | 1.226E-03       | 10,10011         | ← | 9,9110             | 101614.120   | 2.526E-02       |
| 7,8     | ← | 6,7   | 518714.3310 | 518714.3490  | 3.970E-04       | 7,17             | ← | 6,06               | 70020.186    | 2.507E-02       |
| 7,7     | ← | 6,6   |             | 518714.3478  | 3.431E-04       | 7,07             | ← | 6,16               | 70020.186    | 2.507E-02       |
| 2,1     | ← | 1,2   |             | 148221.5435  | 3.246E-04       | 10,7411          | ← | 9,6310             | 79289.079    | 2.492E-02       |
| 5,5     | ← | 4,5   |             | 370533.2476  | 3.238E-04       | 10,7311          | ← | 9,6410             | 79289.156    | 2.492E-02       |
| 5,5     | ← | 4,5   |             | 370533.2476  | 3.238E-04       | 8,728            | ← | 7,617              | 73112.399    | 2.457E-02       |
| 7,6     | ← | 6,5   |             | 518714.3455  | 2.964E-04       | 8,718            | ← | 7,627              | 73112.401    | 2.457E-02       |
| 3,2     | ← | 2,3   |             | 222329.3488  | 8.802E-05       | 6,617            | ← | 5,506              | 59487.103    | 2.456E-02       |
| 6,6     | ← | 5,6   |             | 444627.1943  | 5.804E-05       | 6,607            | ← | 5,516              | 59487.108    | 2.456E-02       |

<sup>a</sup>Experimental values for  $HCNH^+$  in Quénard *et al.* (2017)

Table S13: M06-2X/6-31G(d,p) calculated frequencies and intensities for hyperfine strongest lines of  $2CNTH^+$  and  $3CNTH^+$  at 10.00 K.

| $2CNTH^+$        |   |                    |              |                 | $3CNTH^+$        |   |                    |              |                 |
|------------------|---|--------------------|--------------|-----------------|------------------|---|--------------------|--------------|-----------------|
| $J'_{K-1K+1} F'$ | ← | $J''_{K-1K+1} F''$ | $\nu_{calc}$ | $Int (nm^2MHz)$ | $J'_{K-1K+1} F'$ | ← | $J''_{K-1K+1} F''$ | $\nu_{calc}$ | $Int (nm^2MHz)$ |
| 8,19             | ← | 7,08               | 80552.491    | 3.051E-02       | 7,18             | ← | 6,07               | 91719.252    | 1.220E-01       |
| 8,09             | ← | 7,18               | 80552.491    | 3.051E-02       | 7,08             | ← | 6,17               | 91719.252    | 1.220E-01       |
| 9,110            | ← | 8,09               | 91083.833    | 2.903E-02       | 8,19             | ← | 7,28               | 94375.606    | 1.165E-01       |
| 9,010            | ← | 8,19               | 91083.833    | 2.903E-02       | 8,29             | ← | 7,18               | 94375.606    | 1.165E-01       |
| 7,18             | ← | 6,07               | 70020.211    | 2.901E-02       | 8,19             | ← | 7,08               | 105623.208   | 1.150E-01       |
| 7,08             | ← | 6,17               | 70020.211    | 2.901E-02       | 8,09             | ← | 7,18               | 105623.208   | 1.150E-01       |
| 9,8210           | ← | 8,19               | 83644.940    | 2.865E-02       | 6,17             | ← | 5,06               | 77814.426    | 1.133E-01       |
| 9,8110           | ← | 8,29               | 83644.940    | 2.865E-02       | 6,07             | ← | 5,16               | 77814.426    | 1.133E-01       |
| 8,29             | ← | 7,18               | 73112.444    | 2.790E-02       | 9,7310           | ← | 8,629              | 97031.498    | 1.106E-01       |
| 8,19             | ← | 7,28               | 73112.446    | 2.790E-02       | 9,7210           | ← | 8,639              | 97031.498    | 1.106E-01       |
| 8,818            | ← | 7,07               | 80552.471    | 2.687E-02       | 7,628            | ← | 6,517              | 80470.751    | 1.105E-01       |
| 8,808            | ← | 7,17               | 80552.471    | 2.687E-02       | 7,618            | ← | 6,527              | 80470.752    | 1.105E-01       |
| 10,9111          | ← | 9,8210             | 94176.399    | 2.667E-02       | 9,8210           | ← | 8,719              | 108279.540   | 1.077E-01       |
| 10,9211          | ← | 9,8110             | 94176.399    | 2.667E-02       | 9,8110           | ← | 8,729              | 108279.540   | 1.077E-01       |
| 10,8311          | ← | 9,7210             | 86735.919    | 2.660E-02       | 8,639            | ← | 7,528              | 83126.400    | 1.074E-01       |
| 10,8211          | ← | 9,7310             | 86735.920    | 2.660E-02       | 8,629            | ← | 7,538              | 83126.403    | 1.074E-01       |
| 9,7310           | ← | 8,629              | 76202.620    | 2.654E-02       | 7,17             | ← | 6,06               | 91719.227    | 1.054E-01       |
| 9,7210           | ← | 8,639              | 76202.635    | 2.654E-02       | 7,07             | ← | 6,16               | 91719.227    | 1.054E-01       |
| 9,919            | ← | 8,808              | 91083.817    | 2.594E-02       | 10,7411          | ← | 9,6310             | 99686.583    | 1.041E-01       |
| 9,909            | ← | 8,818              | 91083.817    | 2.594E-02       | 10,7311          | ← | 9,6410             | 99686.584    | 1.041E-01       |
| 9,829            | ← | 8,718              | 83644.903    | 2.560E-02       | 9,6410           | ← | 8,539              | 85780.837    | 1.036E-01       |
| 9,819            | ← | 8,728              | 83644.903    | 2.560E-02       | 9,6310           | ← | 8,549              | 85780.851    | 1.036E-01       |
| 10,1011          | ← | 9,910              | 101614.120   | 2.526E-02       | 8,718            | ← | 7,627              | 94375.562    | 1.026E-01       |
| 10,10011         | ← | 9,9110             | 101614.120   | 2.526E-02       | 8,728            | ← | 7,617              | 94375.562    | 1.026E-01       |
| 7,17             | ← | 6,06               | 70020.186    | 2.507E-02       | 8,818            | ← | 7,707              | 105623.189   | 1.013E-01       |
| 7,07             | ← | 6,16               | 70020.186    | 2.507E-02       | 8,808            | ← | 7,717              | 105623.189   | 1.013E-01       |
| 10,7411          | ← | 9,6310             | 79289.079    | 2.492E-02       | 10,8311          | ← | 9,7210             | 110935.530   | 1.002E-01       |
| 10,7311          | ← | 9,6410             | 79289.156    | 2.492E-02       | 10,8211          | ← | 9,7310             | 110935.530   | 1.002E-01       |
| 8,728            | ← | 7,617              | 73112.399    | 2.457E-02       | 10,6511          | ← | 9,5410             | 88433.410    | 9.885E-02       |
| 8,718            | ← | 7,627              | 73112.401    | 2.457E-02       | 10,6411          | ← | 9,5510             | 88433.459    | 9.885E-02       |
| 6,617            | ← | 5,506              | 59487.103    | 2.456E-02       | 9,739            | ← | 8,628              | 97031.448    | 9.882E-02       |
| 6,607            | ← | 5,516              | 59487.108    | 2.456E-02       | 9,729            | ← | 8,638              | 97031.448    | 9.882E-02       |

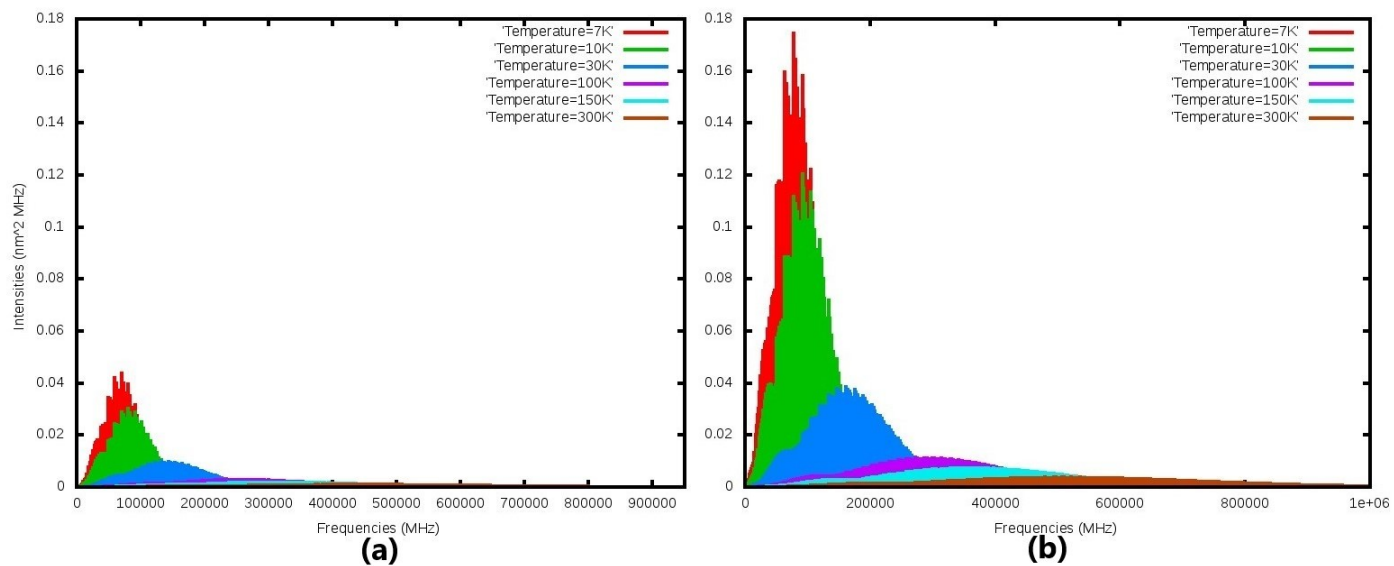

Figure S3: Comparison of  $^{14}\text{N}$  quadrupole hyperfine spectra of (a)  $2\text{CNTH}^+$  and (b)  $3\text{CNTH}^+$  for different temperatures ( $T = 7, 10, 30, 100$  and  $300 \text{ K}$ ).
