# Supplementary figures and images for: Theoretical investigation of protonated thiophene and two of its nitrile substituted derivatives (2-cyanothiophene and 3-cyanothiophene)
Source: Royal Society of Chemistry journal article supplement (doi:10.1039/d0cp03154b), 2020-01-01

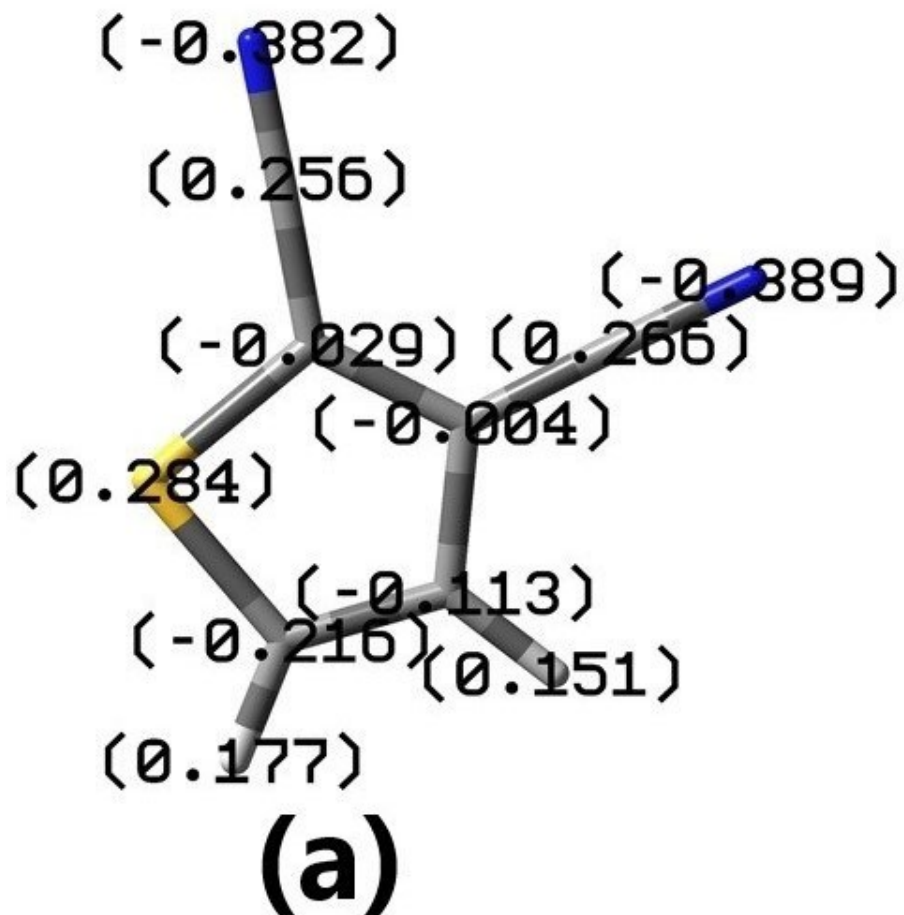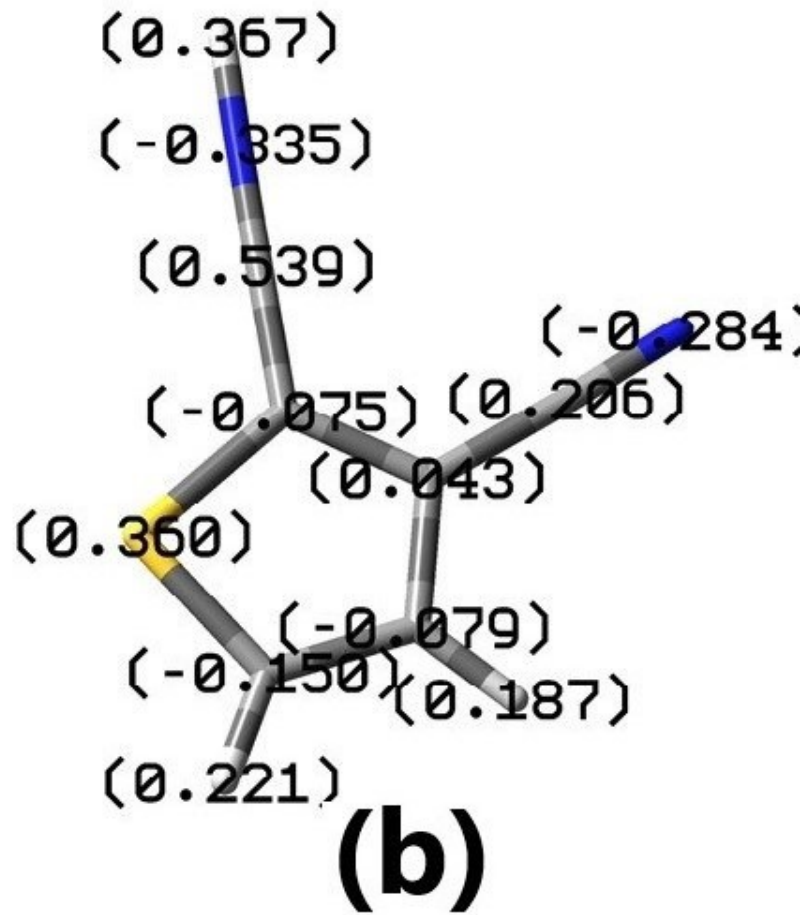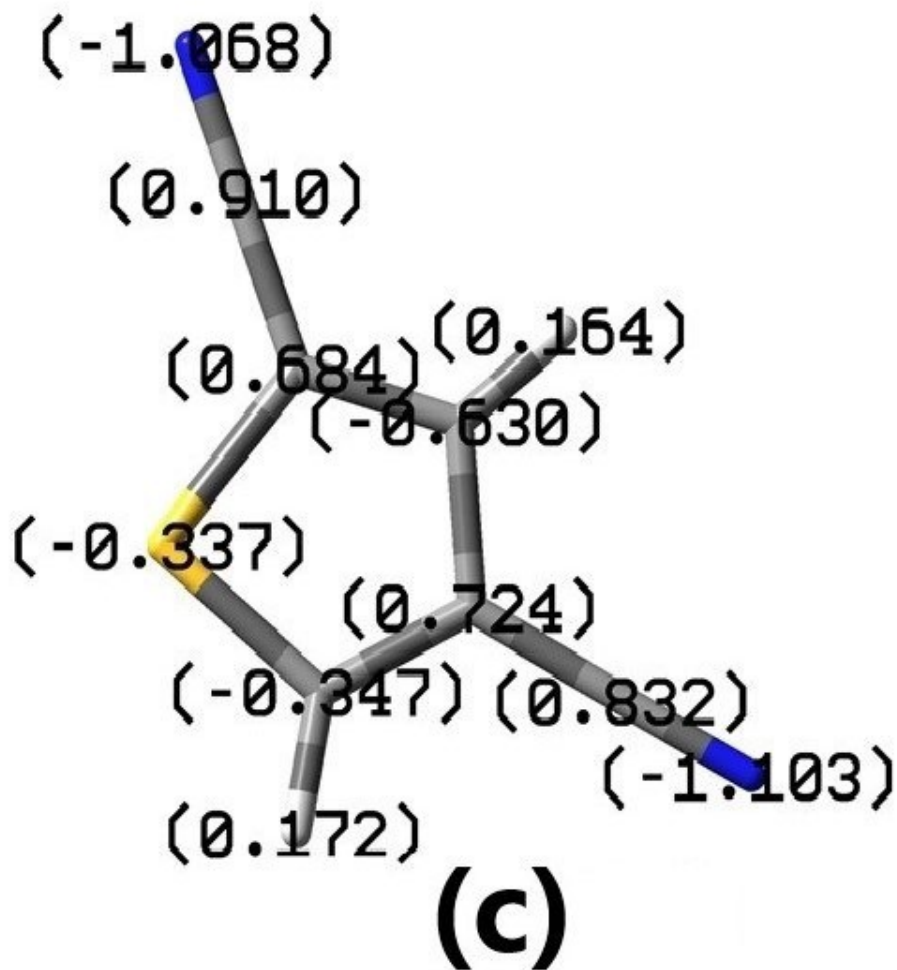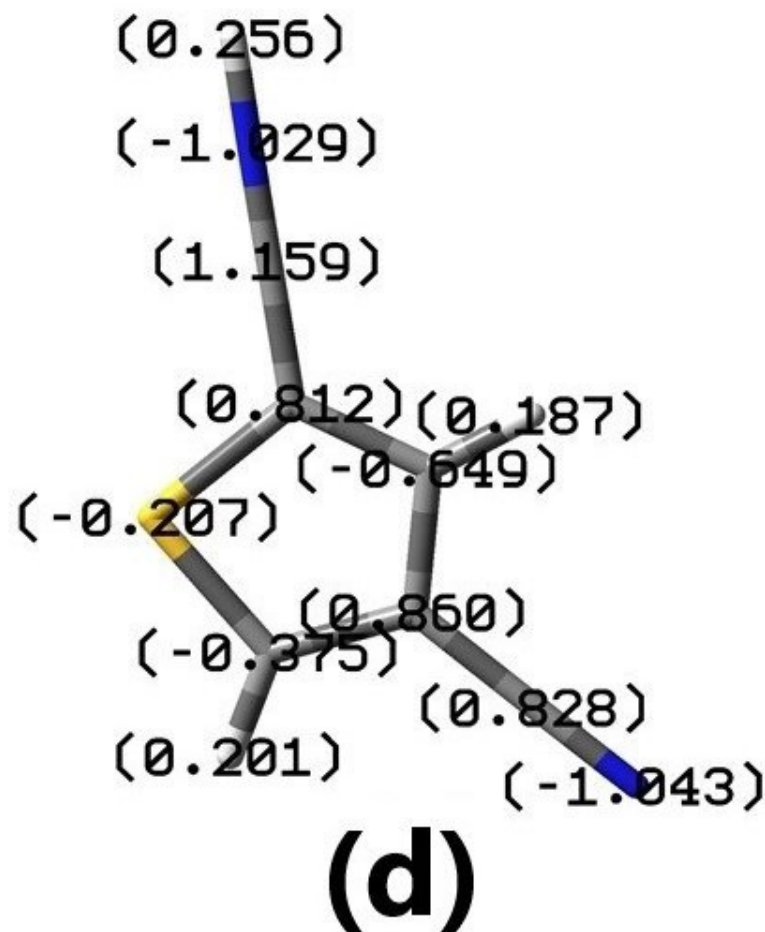

Supplement: d0cp03154b1.pdf [file d0cp03154b1.pdf]

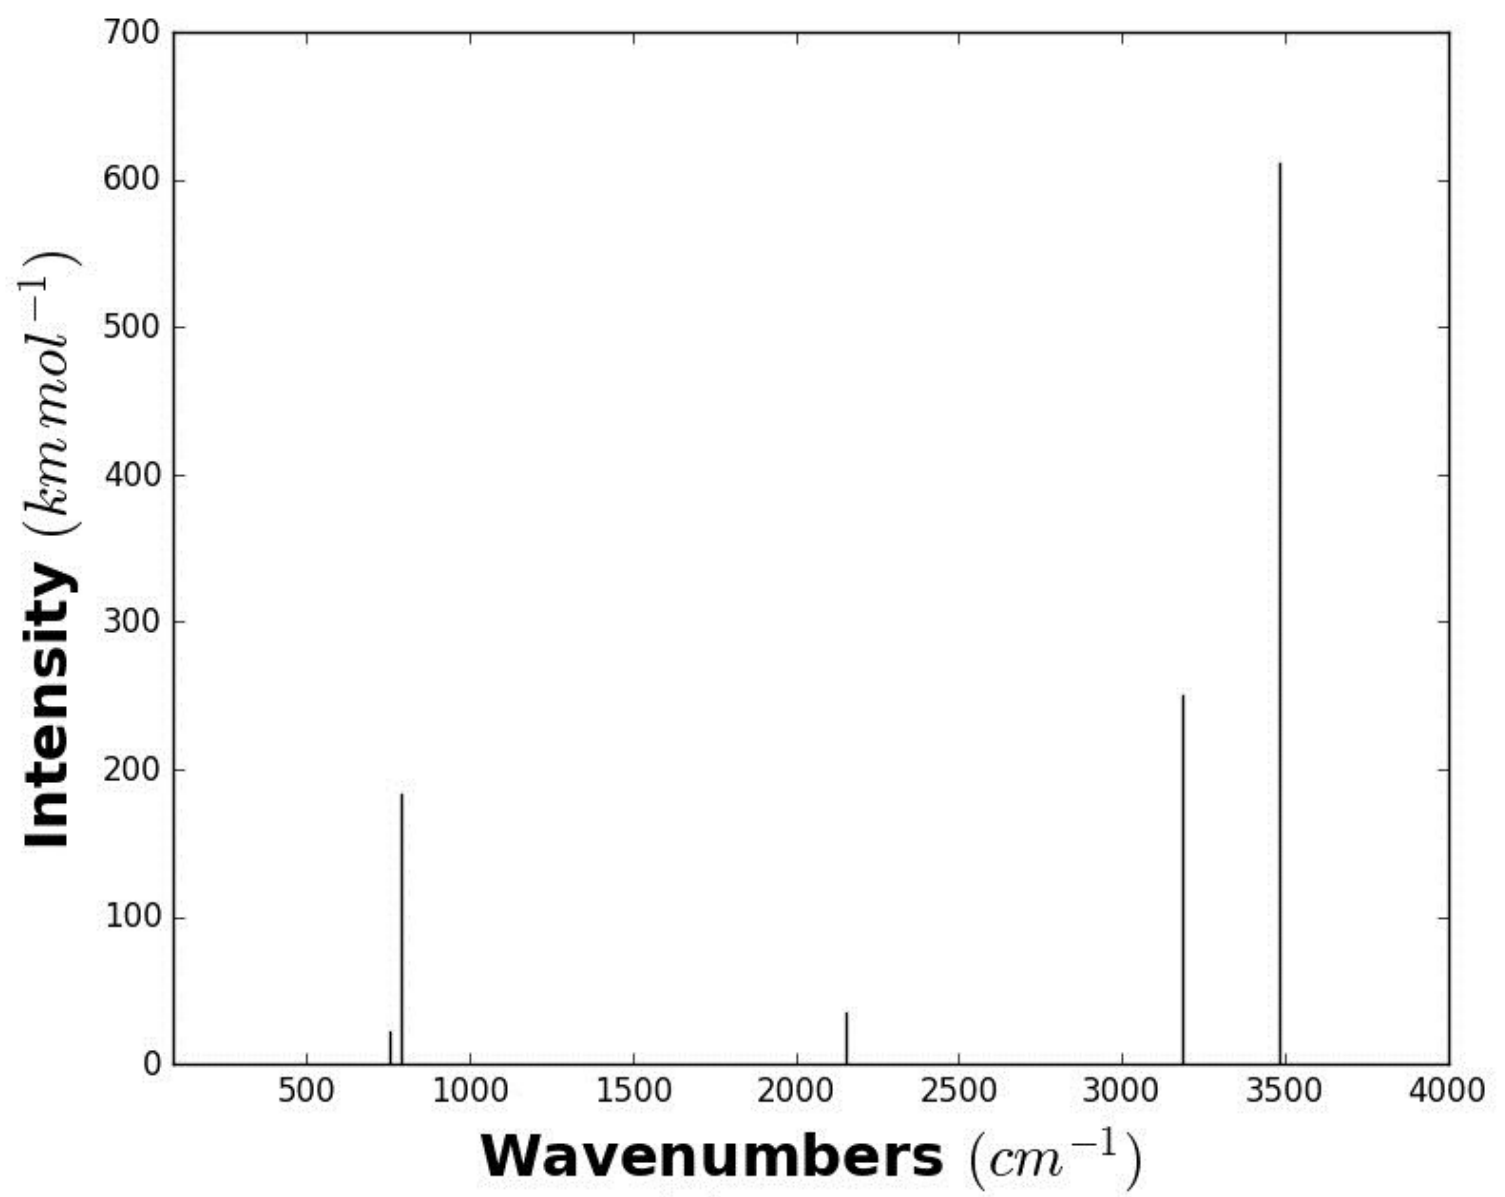

(a)

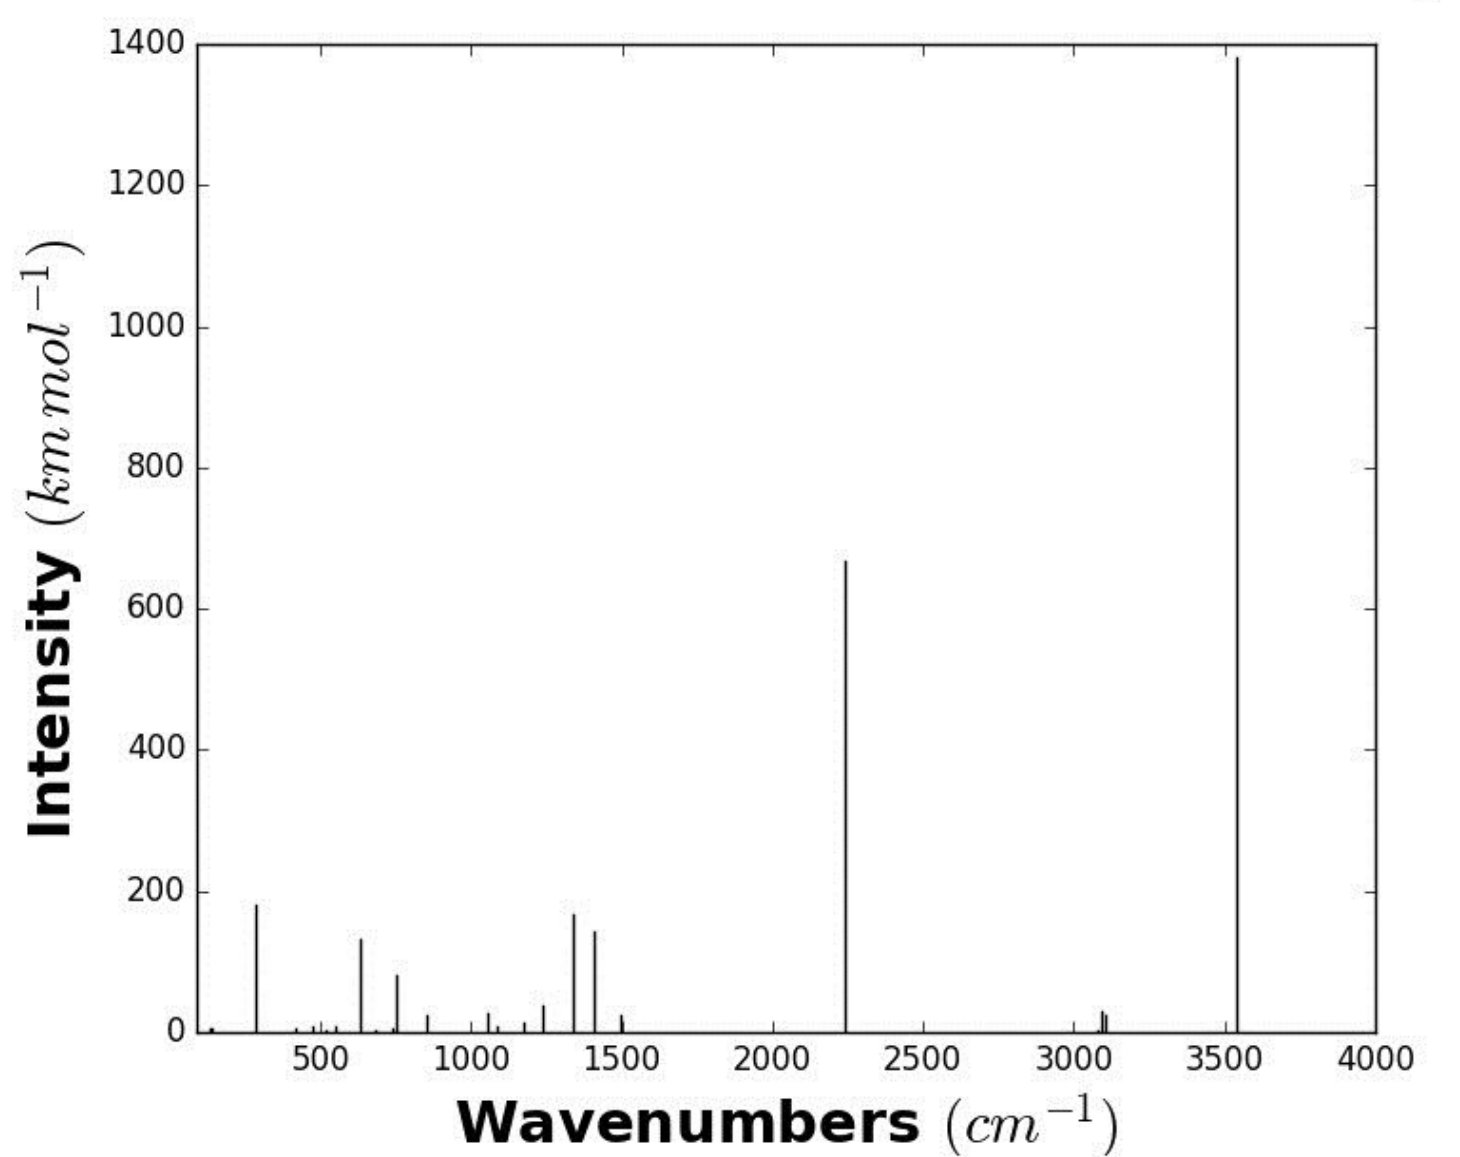

(b)

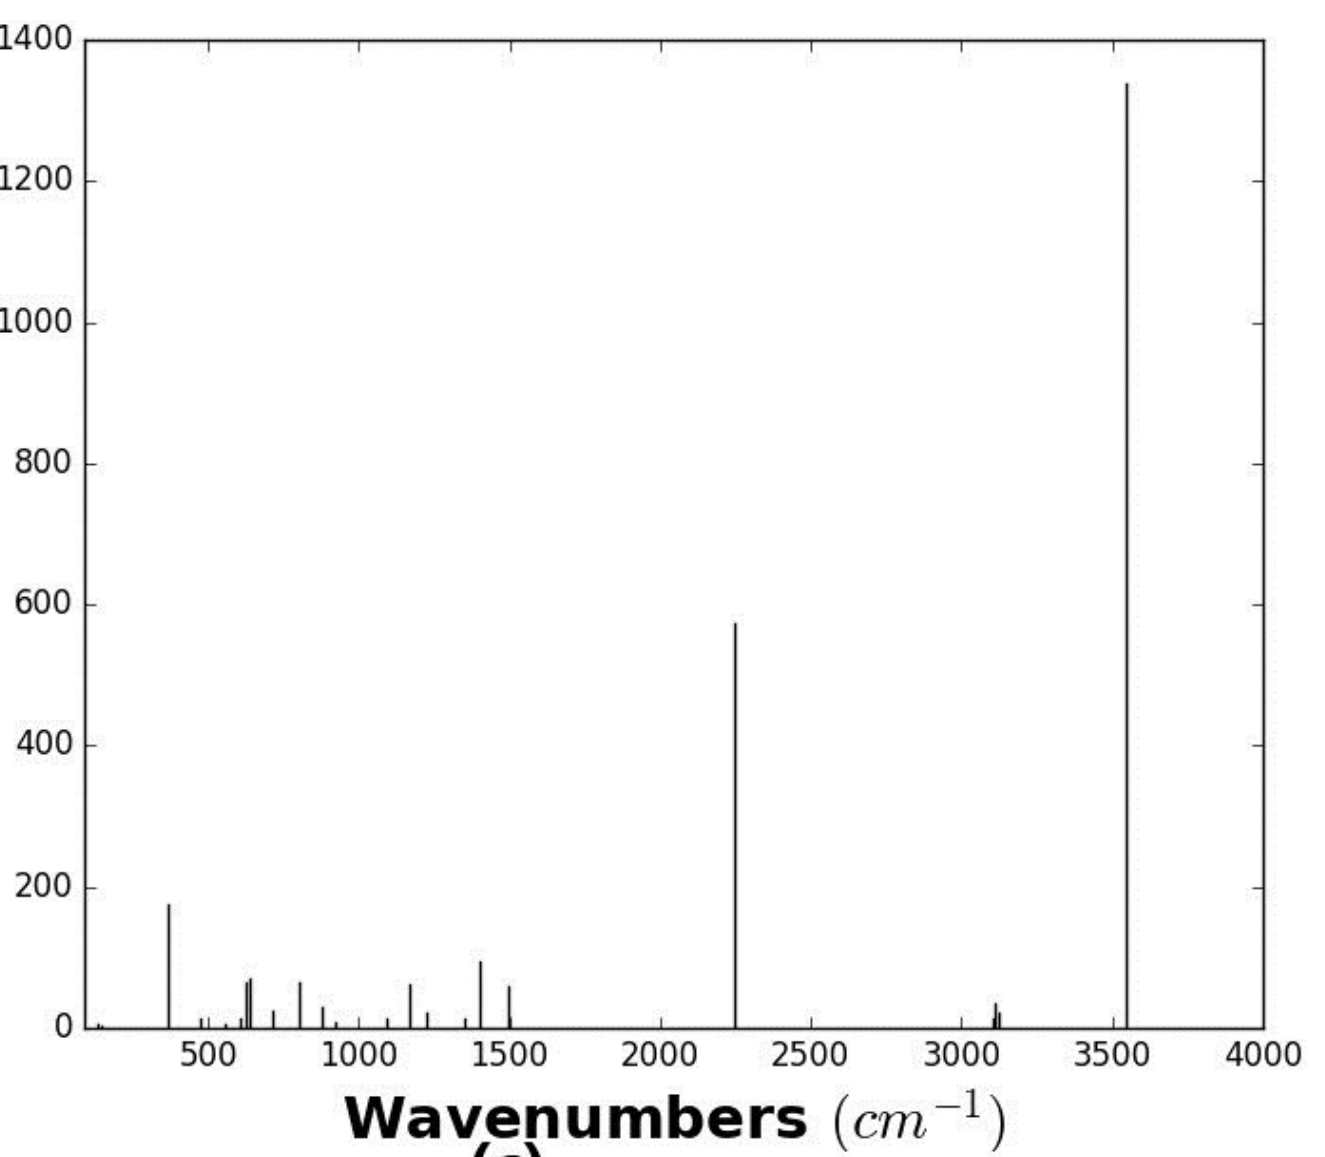

(c)

Supplement: d0cp03154b2.pdf [file d0cp03154b2.pdf]

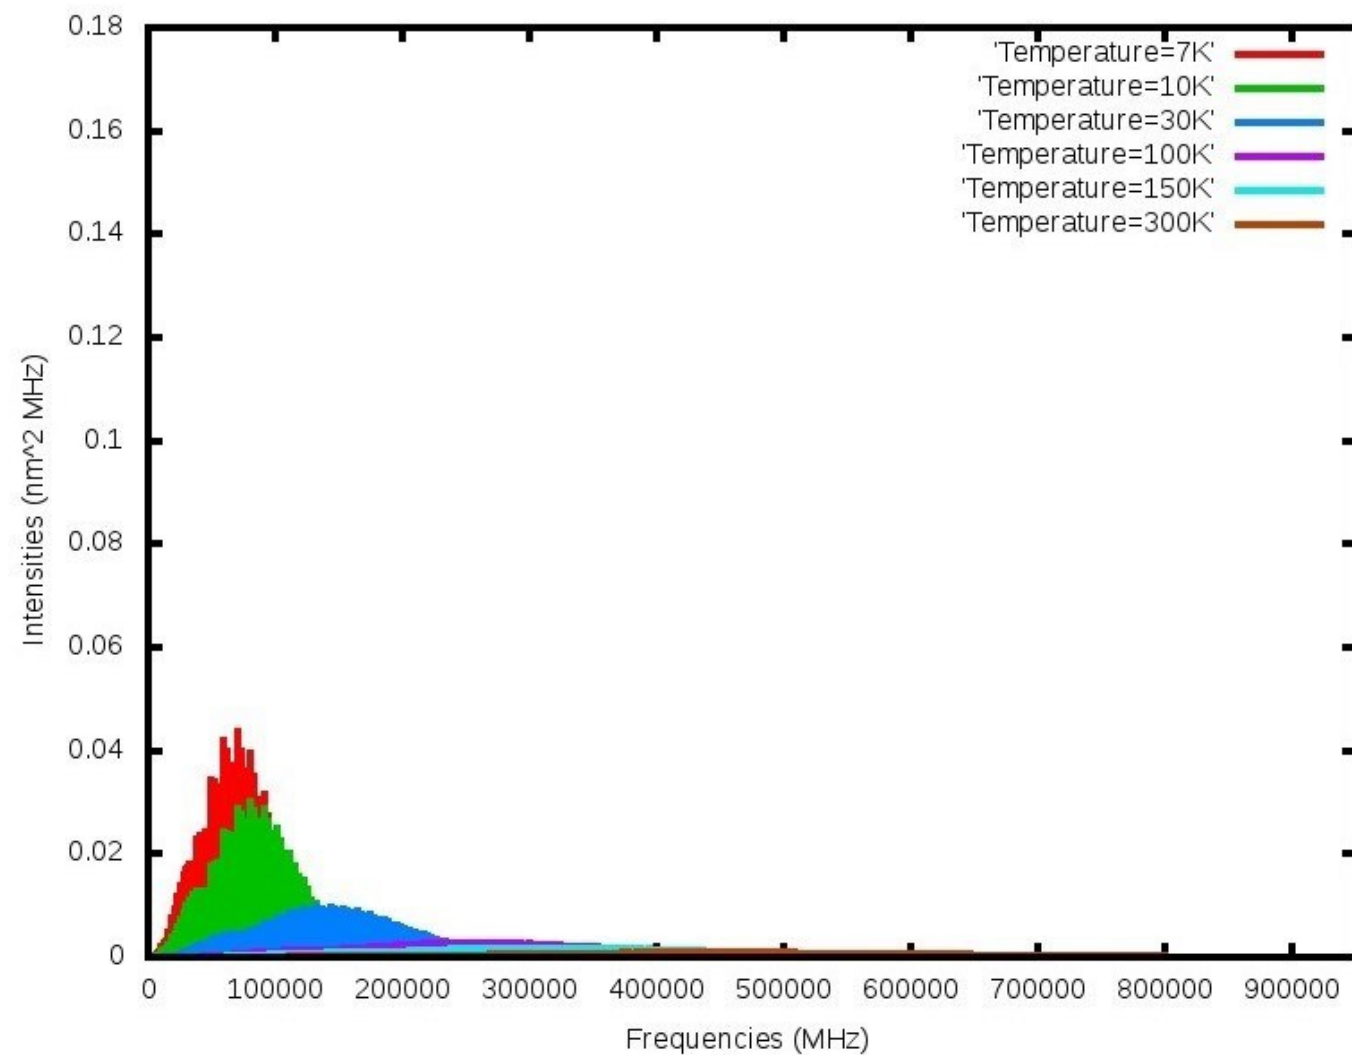

**(a)**

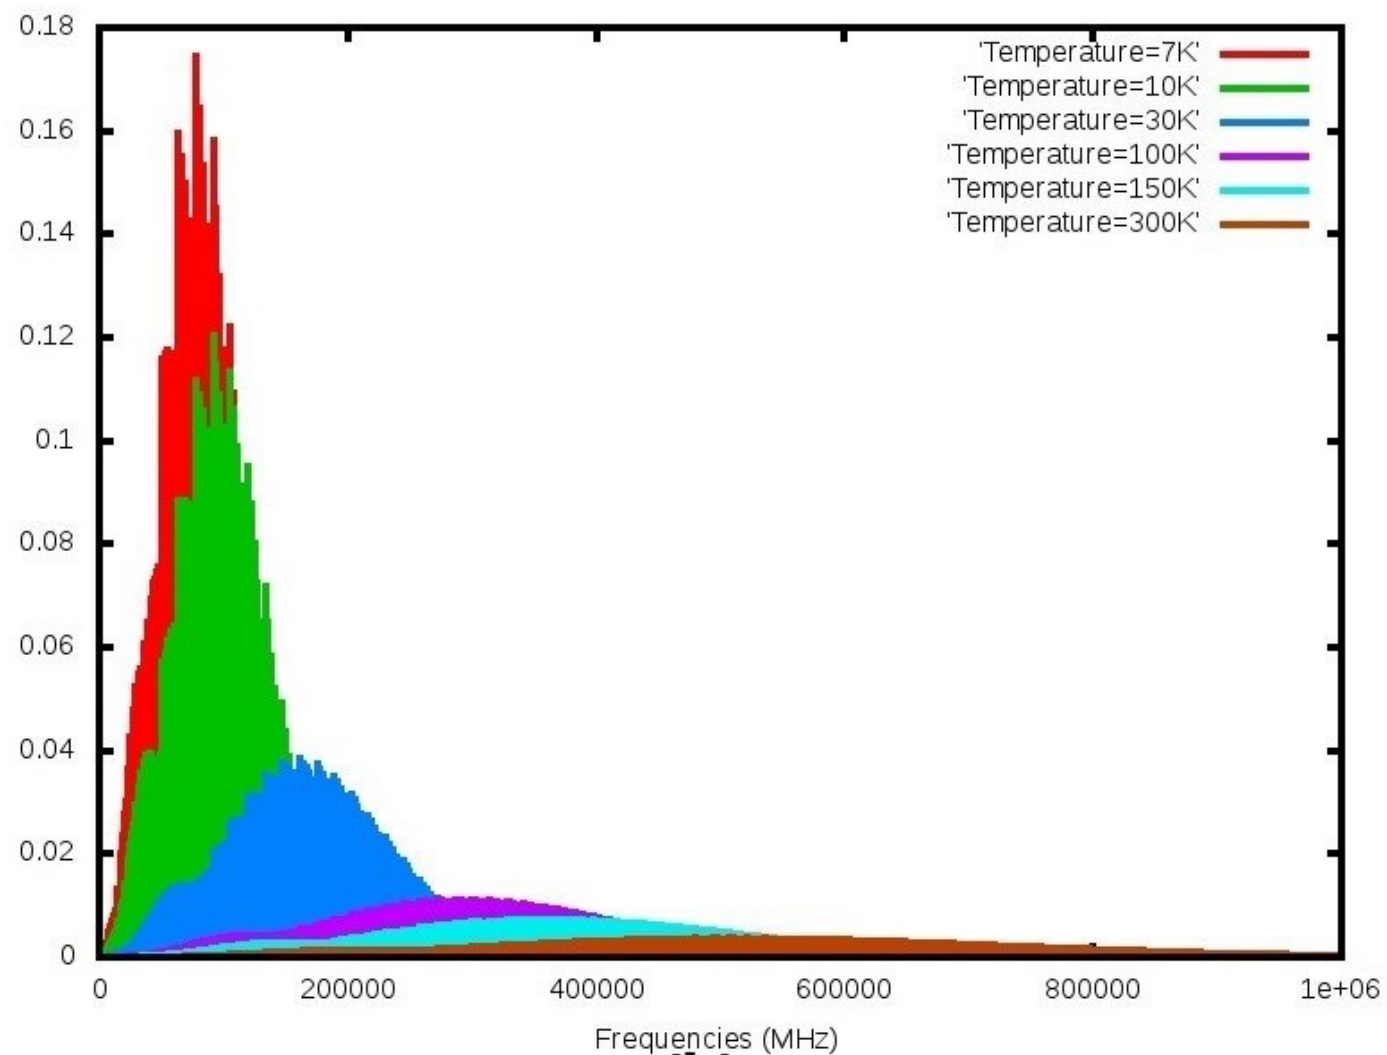

**(b)**

Supplement: d0cp03154b3.pdf [file d0cp03154b3.pdf]
